# Supplementary material
Source: PubMed Central journal article supplement (PMC2708864)
Supplement: supp_M809787200_Supplement_Table_S1.pdf [file supp_M809787200_Supplement_Table_S1.pdf]

**SUPPLEMENTAL DATA****TABLE S1****Partial putative extracellular cellular matrix gene targets of significantly changed microRNAs**

| <b>microRNA</b>           | <b>Target Gene</b>                                                          |
|---------------------------|-----------------------------------------------------------------------------|
| <b>mmu-miR-29b-2</b>      | Col1a1, Col1a2, Col5a1, Col5a2, Col5a3, Col4a1, Col4a2, Col4a3, NID2, SPARC |
| <b>mmu-let-7a-1</b>       | Col1a1, Col1a2, Col5a2, Col4a1, Col4a2, NID2                                |
| <b>mmu-let-7a-2</b>       | Col1a1, Col1a2, Col5a2, Col4a1, Col4a2, NID2                                |
| <b>mmu-let-7c-1</b>       | Col1a1, Col1a2, Col5a2, Col4a1, Col4a2, NID2                                |
| <b>mmu-let-7d</b>         | Col1a1, Col1a2, Col5a2, Col4a1, Col4a2, NID2                                |
| <b>mmu-let-7f-1</b>       | Col1a1, Col1a2, Col5a2, Col4a1, Col4a2, NID2                                |
| <b>mmu-let-7f-2</b>       | Col1a1, Col1a2, Col5a2, Col4a1, Col4a2, NID2                                |
| <b>mmu-miR-196b</b>       | Col1a1, Col1a2                                                              |
| <b>mmu-miR-218-1</b>      | Col1a1                                                                      |
| <b>mmu-miR-218-2-prec</b> | Col1a1                                                                      |
| <b>mmu-miR-26a-1</b>      | Col1a2, Col5a1                                                              |
| <b>mmu-miR-26a-2</b>      | Col1a2, Col5a1                                                              |
| <b>mmu-miR-26b</b>        | Col1a2, Col5a1                                                              |
| <b>mmu-miR-135-prec</b>   | Col5a1, Col4a3                                                              |
